# Supplementary figures and images for: Tracking the transformation and transport of arsenic sulfide pigments in paints: synchrotron-based X-ray micro-analyses
Source: Royal Society of Chemistry journal article supplement (doi:10.1039/c4ja00424h), 2015-01-01

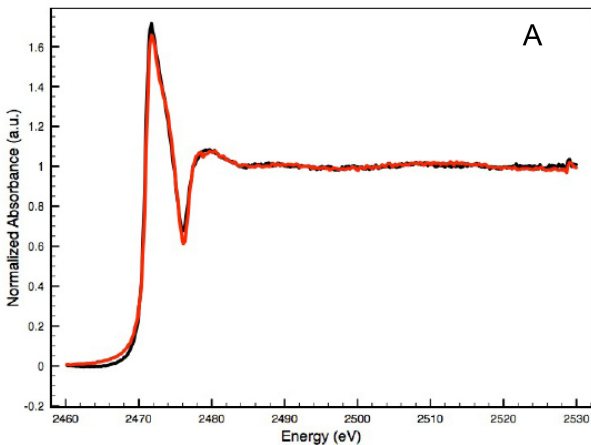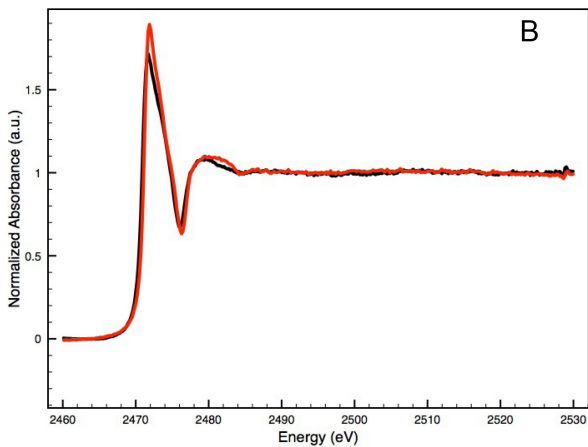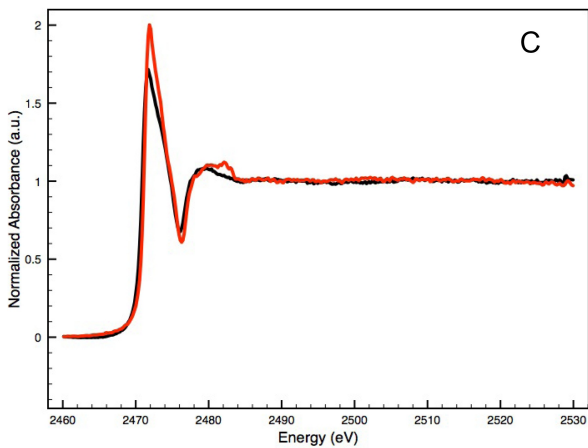

Supplement: c4ja00424h2.pdf [file c4ja00424h2.pdf]
